# Supplementary material for: MiR172-APETALA2-like genes integrate vernalization and plant age to control flowering time in wheat
Source: PLoS Genet. 2022 Apr 25;18(4):e1010157. doi: 10.1371/journal.pgen.1010157 (PMC9037917; doi:10.1371/journal.pgen.1010157)
Supplement: S1 Table — (XLSX) [file pgen.1010157.s001.xlsx]

## Sheet: Table S1
Table S1. Gene IDs in CS Ref. Seq. v1.1 for AP2L genes in wheat
AP2L1	AP2L-A1	TraesCS1A02G058400	AP2L-B1	TraesCS1B02G076300	AP2L-D1	TraesCS1D02G059200
AP2L2	AP2L-A2	TraesCS2A02G514200	AP2L-B2	TraesCS2B02G542400	AP2L-D2	TraesCS2D02G515800
AP2L5	AP2L-A5	TraesCS5A02G473800	AP2L-B5	TraesCS5B02G486900	AP2L-D5	TraesCS5D02G486600
AP2L7	AP2L-A7	TraesCS7A02G744600LC	AP2L-B7	TraesCS7B02G440400	AP2L-D7	TraesCS7D02G512600
